# Supplementary material for: Insights from impedance spectroscopy into the mechanism of thermal decomposition of M(NH2BH3), M = H, Li, Na, Li0.5Na0.5, hydrogen stores
Source: Royal Society of Chemistry journal article supplement (doi:10.1039/c2cp23344d), 2012-01-01
Supplement: c2cp23344d.pdf [file c2cp23344d.pdf]

## ELECTRONIC SUPPLEMENTARY INFORMATION

### “Insights from impedance spectroscopy into mechanism of thermal decomposition of $M(\text{NH}_2\text{BH}_3)$ $M=\text{H, Li, Na, Li}_{0.5}\text{Na}_{0.5}$ hydrogen stores”

Karol J. Fijalkowski, Rafał Jurczakowski, Wiktor Koźmiński and Wojciech Grochala

#### **Contents**

1. Synthesis and thermal decomposition of alkali metal amidoboranes:  
NaAB LiAB NaLi(AB)<sub>2</sub>
2. Powder EIS data at elevated temperature:  
NaAB LiAB NaLi(AB)<sub>2</sub> AB
3. Powder EIS isothermal scans at 38°C, 48°C and 65°C:  
NaAB
4. Comparison of TGA/DSC experiments carried out with 10 K/min and 1 K/min:  
NaAB LiAB NaLi(AB)<sub>2</sub> AB
5. Comparison of FTIR spectra of thermally treated and aged samples:  
NaAB LiAB NaLi(AB)<sub>2</sub>
6. Tables of IR absorption bands of alkali metal amidoboranes:  
NaAB LiAB NaLi(AB)<sub>2</sub>
7. XRD study of thermal decomposition of alkali metal amidoboranes:  
NaAB NaLi(AB)<sub>2</sub>
8. Solid state <sup>1</sup>H NMR and <sup>11</sup>B NMR study of alkali metal amidoboranes:  
NaAB LiAB NaLi(AB)<sub>2</sub>
9. Attempts of pre-desorption of NH<sub>3</sub>: isothermal heating of NaAB at 48°C and 60°C.
10. Heat capacity measurements and low temperature XRD study of NaAB.

## 1. Synthesis of alkali metal amidoboranes:

We used LiH, NaH, LiNH<sub>2</sub> (all 95%, Sigma Aldrich) and NH<sub>3</sub>BH<sub>3</sub> of the highest commercially available purity (98%, JSC Aviabor). We synthesized alkali metal amidoboranes in a dry mechanochemical way described in the literature, using tungsten carbide disk milling vessel together with a high energy mill from Testchem. All operations were carried out under argon atmosphere with no contact with atmospheric air, according to the reaction equations:

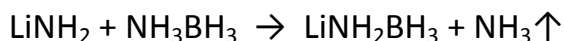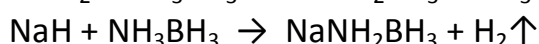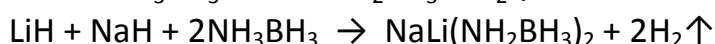

Milling was carried out with 5 minutes breaks to avoid thermal decomposition of the product during milling. Regimes of milling are shown below:

NaNH<sub>2</sub>BH<sub>3</sub>            3 times per 1 minute milling

LiNH<sub>2</sub>BH<sub>3</sub>            2 times per 3 minutes of milling

NaLi(NH<sub>2</sub>BH<sub>3</sub>)<sub>2</sub>    3 times per 3 minutes of milling

Different milling regimes for different amidoboranes reflect optimization of the milling process due to stability differences of the products.

Since our previous paper (Ref.8) was published, we have improved method of synthesis NaAB (milling procedure contains longer breaks for cooling, or even it is performed at cryogenic LN<sub>2</sub> conditions to minimize both thermal decomposition as well as transition to the ionic phase). We have also changed the TGA/DSC/MS procedure which now is much more accurate (the measurement commences at -10°C to get very stable signals from 20°C upwards).

## 2. IS data at elevated temperature

Imaginary part of electric modulus,  $M''$ , vs. logarithm of frequency exhibits a distinct peak, which is shifted toward higher frequency as the temperature is raised (cf. Fig.S2.1). The position of this peak nearly coincides with that for the imaginary part of impedance,  $Z''$  (Fig.S2.2), and both are clearly separated from the characteristic frequency of dissipation factor,  $\tan(\delta)$  (Fig. S2.2). This type of behavior is typical for long range conductivity [R. Gerhardt, J. Phys. Chem. Solids, 55 (1994) 1491-1506].

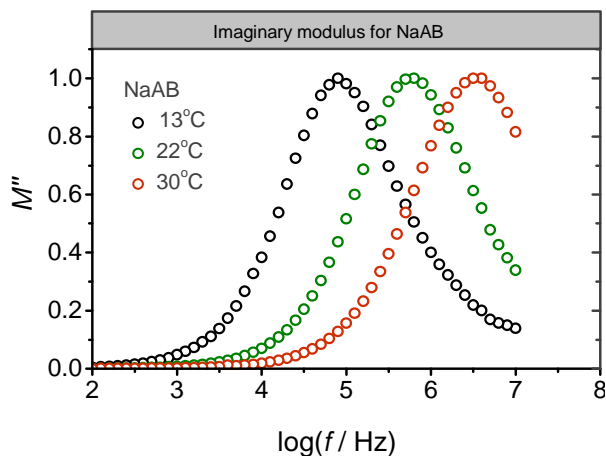

**Fig. S2.1.** Imaginary part of electric modulus  $M''$  normalized to peak for sodium amidoborane at different temperatures.

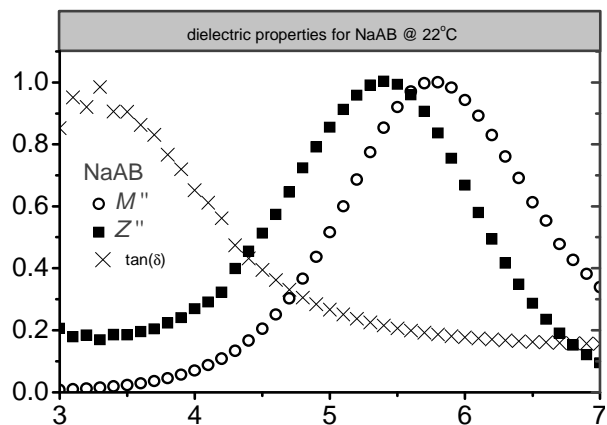

**Fig. S2.2.** The nearly overlapping peaks of the imaginary part of electric modulus  $M''$  and imaginary part of impedance  $Z''$  vs. frequency with an accompanying  $\tan\delta$  indicating that the conductivity is of a long range nature. Data for sodium amidoborane at 22°C.

### 3. Powder EIS isothermal scans for NaAB at 38°C, 48°C and 65°C:

We observe growth (followed by shallow decrease) of conductivity of amidoborane samples during isothermal measurements at room or at elevated temperatures. Experiments performed at different temperatures (38°C, 48°C, 65°C) indicate that the time needed to reach of the conductivity peak is smaller and the rate of initial conductivity growth is higher when temperature is higher.

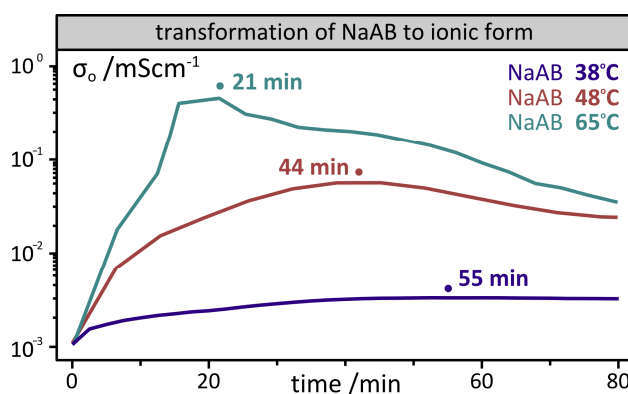

**Fig. S3.** Conductivity evolution in time for NaAB samples during isothermal EIS measurements at three different temperatures.

#### 4. Comparison of TGA/DSC experiments carried out with 10 K/min and 1 K/min:

We observe emission of hydrogen significantly contaminated with ammonia. To determine if the processes of hydrogen and ammonia evolution are independent we performed TGA/DSC measurements with two scanning rates: 10 K/min and 1 K/min. We observe ammonia evolution as a separate process preceding evolution of hydrogen for all investigated alkali amidoboranes. At 1 K/min experiment hydrogen evolution region is marked with solid gray, ammonia evolution is marked with striped field.

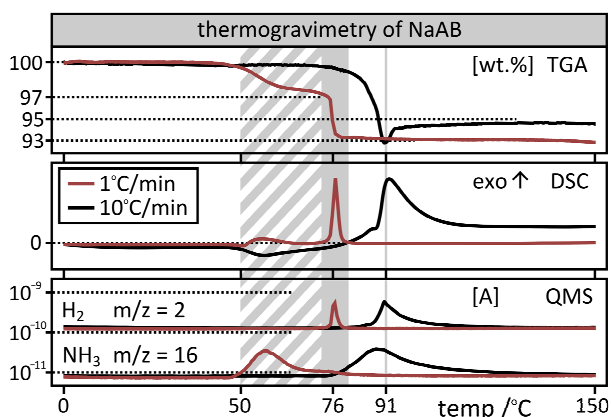

**Fig. S4.1.** Comparison of TGA/DSC experiments with 10 K/min and 1 K/min scanning rate of NaAB sample.

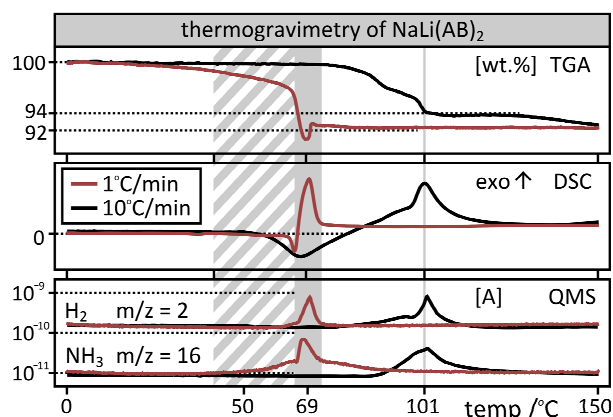

**Fig. S4.3.** Comparison of TGA/DSC experiments with 10 K/min and 1 K/min scanning rate of NaLi(AB)<sub>2</sub> sample.

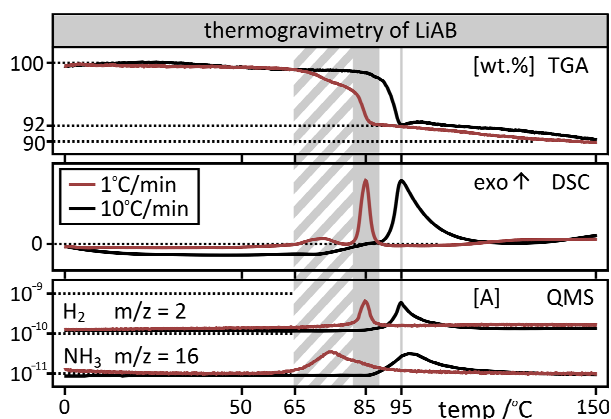

**Fig. S4.2.** Comparison of TGA/DSC experiments with 10 K/min and 1 K/min scanning rate of LiAB sample.

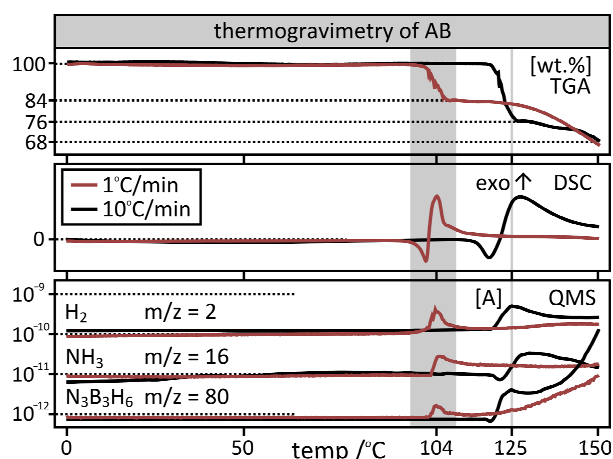

**Fig. S4.4.** Comparison of TGA/DSC experiments with 10 K/min and 1 K/min scanning rate of AB sample.

## 5. Comparison of FTIR spectra of thermally treated and aged samples.

To check what is the effect ammonia evolution we collected FTIR spectra of fresh amidoboranes heated to c.a. 50°C. Decomposition over 100°C was also monitored. We observe that thermal decomposition and spontaneous decomposition might follow the same scenario – for confirmation we collected series of spectra of aged samples.

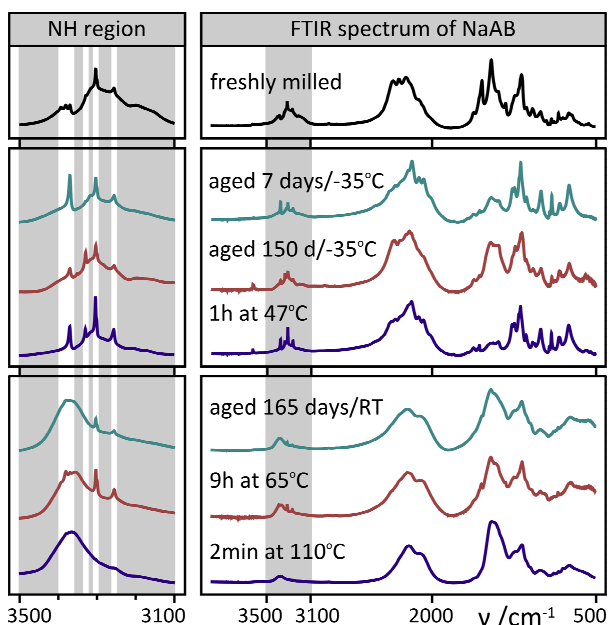

**Fig. S5.1.** Comparison of FTIR spectra of thermally treated and aged samples of NaAB.

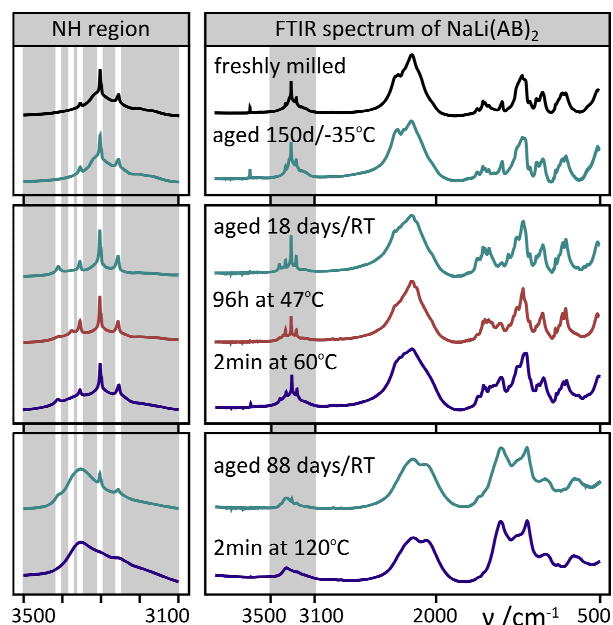

**Fig. S5.3.** Comparison of FTIR spectra of thermally treated and aged samples of NaLi(AB)<sub>2</sub>

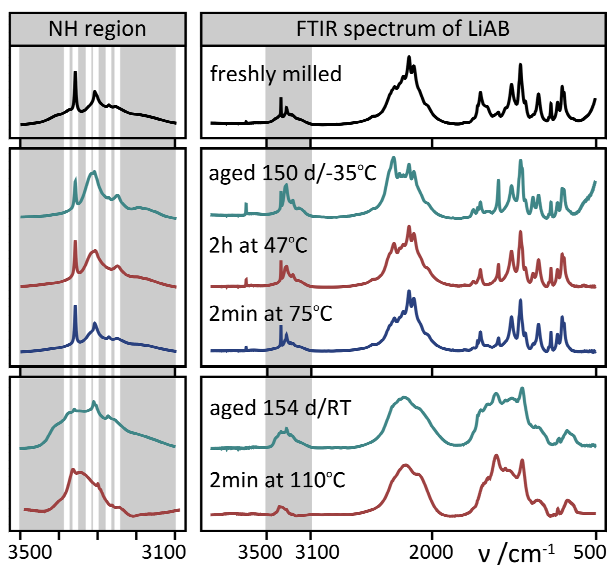

**Fig. S5.2.** Comparison of FTIR spectra of thermally treated and aged samples of LiAB.

## 6.1. Table of IR absorption bands of NaAB

**Table S6.1.** Absorption bands detected in IR spectra (wavenumber [ $\text{cm}^{-1}$ ]) of NaAB at elevated temperature and after aging. Absorption bands of fresh AB, LiAB and NaLi(AB)<sub>2</sub> at RT are shown for comparison. Assignment of the bands for AB is according to J. Baumann *et al.*, *Thermochim. Acta*, **430** (2005) 430. ( $\nu$  = stretching,  $\delta$  = deformation: bending and torsional modes).

| Band                           | fresh at room temperature |                                                   |                                                             | NaAB                                                 |                                                    |                                                                          |                                                            |                               |                                 |                          |
|--------------------------------|---------------------------|---------------------------------------------------|-------------------------------------------------------------|------------------------------------------------------|----------------------------------------------------|--------------------------------------------------------------------------|------------------------------------------------------------|-------------------------------|---------------------------------|--------------------------|
|                                | AB                        | LiAB                                              | NaLi(AB) <sub>2</sub>                                       | fresh/RT                                             | 7d/-35°C                                           | 150d/-35°C                                                               | 1h/47°C                                                    | 165d/RT                       | 9h/64°C                         | 2m/110°C                 |
| <b><math>\nu</math>(NH)</b>    |                           |                                                   |                                                             | <b>3393 vw</b><br><b>3380 vw</b><br><b>3369 vw</b>   |                                                    |                                                                          |                                                            |                               |                                 |                          |
|                                |                           | <b>3370 sh</b><br><b>3359 m</b>                   | <b>3354 w</b>                                               | 3329 vw<br>3303 m<br>3256 w<br>3200 vw               | 3329 vw<br>3303 m<br>3256 w<br>3200 sh             | <b>3370 m</b><br><b>3351 vw</b><br>3329 w<br>3303 m<br>3256 w<br>3199 vw | <b>3369 m</b><br><br>3329 m<br>3303 s<br>3256 m<br>3200 sh | <b>3352 w</b>                 | <b>3380 vw</b><br><b>3365 w</b> | <b>3365 w</b>            |
| <b><math>\nu</math>(BH)</b>    | 2347 vs<br>2289 s         | 2515 sh<br>2326 m<br>2280 sh<br>2245 s<br>2194 vs | 2355 sh<br>2328 s<br>2275 sh<br>2202 vs                     | 2340 s<br>2289 s<br>2224 s                           | 2380 sh<br>2326 s<br>2280 sh<br>2208 vs<br>2174 vs | 2337 s<br>2282 s<br>2225 vs<br>2197 vs<br>2180 vs                        | 2360 sh<br>2324 s<br>2280 sh<br>2205 sh<br>2175 vs         |                               | 2340 sh<br>2280 sh              | 2197 s                   |
|                                | 2118 m                    | 2152 s<br>2035 sh                                 | 2140 sh<br>2025 sh                                          | 2120 sh<br>2065 sh                                   | 2110 s<br>2067 s                                   | 2120 sh<br>2065 sh                                                       | 2110 s<br>2068 s                                           | 2093 s                        |                                 | 2100 sh                  |
| <b><math>\nu</math>(BN)</b>    | 1363 s                    | 1381 w                                            | 1382 m                                                      | 1448 vs<br>1385 m                                    | 1453 s<br>1382 s                                   | 1454 s<br>1391 s                                                         | 1431 w<br>1384 w                                           | 1401 vs<br>1380 sh            | 1449 vs<br>1380 sh              | 1448 vs<br>1380 sh       |
| <b><math>\delta</math>(NH)</b> | 1611 m                    | 1605 sh<br>1570 w<br>1544 m<br>1495 sh            | 1609 vw<br>1557 w<br>1539 w<br>1505 vw                      | 1608 w<br>1532 s                                     | 1611 w<br>1558 w                                   | 1606 w<br>1557 w                                                         | 1611 w<br>1557 w                                           | 1600 sh<br>1530 sh            | 1605 sh<br>1536 m               | 1600 sh<br>1530 sh       |
|                                |                           | 1315 sh<br>1261 s                                 | 1315 sh                                                     | 1317 m<br>1260 sh<br>1232 m<br>1198 vs               | 1261 m<br>1240 m<br>1198 s                         | 1260 sh<br>1234 s<br>1198 s                                              | 1259 s<br>1239 s<br>1199 s                                 | 1315 m<br>1240 sh<br>1195 sh  | 1238 m<br>1195 sh               | 1230 sh<br>1168 m        |
| <b><math>\delta</math>(BH)</b> | 1163 vs<br>1067 s         | 1180 vs<br>1165 sh<br>1135 m<br>1065 sh<br>1016m  | 1185 sh<br>1177 sh<br>1130 w<br>1071 m<br>1055 sh<br>1014 m | 1173 s<br>1129 w<br>1074 w<br>999 w                  | 1183 vs<br>1132 m<br>1072 w<br>998 m               | 1173 vs<br>1134 m<br>1072 m<br>996 w                                     | 1183 vs<br>1133 m<br>1073 w<br>1056 w<br>999 w             | 1165 vs<br>1130 sh<br>1075 sh | 1165 vs<br>1130 sh              | 1168 m                   |
|                                | <b>other</b>              | 920 vw<br>902 w                                   | 915 vw<br>895 w<br>865 sh<br>842 w<br>800 m<br>784 m        | 922 vw<br>901 w<br>880 vw<br>837 w<br>797 w<br>742 w | 921 w<br>901 m<br>830 w<br>744 m                   | 921 vw<br>900 w<br>830 w<br>796 vw<br>742 m                              | 921 w<br>901 m<br>830 w<br>744 m                           | 873 vw<br>824 vw<br>728 m     | 900 w<br>838 w<br>717 m         | 879 vw<br>793 w<br>739 w |

## 6.2. Table of IR absorption bands of LiAB

**Table S6.2.** Absorption bands detected in IR spectra (wavenumber [ $\text{cm}^{-1}$ ]) of LiAB at elevated temperature and after aging. Absorption bands of fresh AB, NaAB and  $\text{NaLi}(\text{AB})_2$  at RT are shown for comparison. Assignment of the bands for AB is according to J. Baumann *et al.*, *Thermochim. Acta*, **430** (2005) 430. ( $\nu$  = stretching,  $\delta$  = deformation: bending and torsional modes).

| Band                | fresh at room temperature    |                                                      |                                             | LiAB                                       |                                           |                                            |                                            |                                                     |                               |
|---------------------|------------------------------|------------------------------------------------------|---------------------------------------------|--------------------------------------------|-------------------------------------------|--------------------------------------------|--------------------------------------------|-----------------------------------------------------|-------------------------------|
|                     | AB                           | NaAB                                                 | $\text{NaLi}(\text{AB})_2$                  | fresh/RT                                   | 150d/-35°C                                | 1h/47°C                                    | 2m/75°C                                    | 154d/RT                                             | 2m/110°C                      |
| $\nu(\text{NH})$    |                              | 3393 vw<br>3380 vw<br>3369 vw                        | 3354 w                                      | 3370 sh<br>3359 m                          | 3360 m<br>3315 sh<br>3310 m               | 3359 m<br>3315 sh<br>3308 m                | 3359 m<br>3315 sh<br>3310 w                | 3359 w<br>3310 m<br>3273 m<br>3250 sh               | 3374 vw<br>3310 vw<br>3250 sh |
|                     | 3311 vs<br>3253 vs<br>3196 s | 3329 vw<br>3303 m<br>3256 w<br>3200 vw               | 3303 m<br>3256 w<br>3215 sh<br>3180 sh      | 3310 w<br>3273 vw<br>3251 vw<br>3185 sh    | 3251 w<br>3196 w                          | 3251 w<br>3185 sh                          | 3251 w<br>3185 sh                          |                                                     |                               |
| $\nu(\text{BH})$    |                              |                                                      | 2355 sh                                     | 2515 sh                                    | 2515 sh<br>2360 sh                        | 2515 sh<br>2360 sh                         | 2515 sh<br>2365 sh                         |                                                     |                               |
|                     | 2347 vs<br>2289 s            | 2340 s<br>2289 s<br>2224 s                           | 2328 s<br>2275 sh<br>2202 vs                | 2326 m<br>2280 sh<br>2245 s<br>2194 vs     | 2333 vs<br>2281 s<br>2246 s<br>2194 vs    | 2330 s<br>2280 sh<br>2244 s<br>2194 vs     | 2326 s<br>2275 sh<br>2246 s<br>2194 vs     | 2340 sh<br>2280 sh<br>2245 vs<br>2195 sh<br>2110 sh | 2340 sh<br>2223 vs<br>2110 sh |
|                     | 2118 m                       | 2120 sh<br>2065 sh                                   | 2140 sh<br>2025 sh                          | 2152 s<br>2035 sh                          | 2150 vs<br>2035 sh                        | 2151 vs<br>2035 sh                         | 2151 vs<br>2036 sg                         |                                                     |                               |
| $\nu(\text{BN})$    |                              | 1448 vs                                              |                                             |                                            |                                           |                                            |                                            |                                                     |                               |
|                     | 1363 s                       | 1385 m                                               | 1382 m                                      | 1381 w                                     | 1380 s                                    | 1380 m                                     | 1380 w                                     | 1400 vs                                             | 1401 vs                       |
| $\delta(\text{NH})$ | 1611 m                       | 1608 w                                               | 1609 vw<br>1557 w                           | 1605 sh<br>1570 w                          | 1607 w<br>1571 w                          | 1606 w<br>1570 sh                          | 1605 sh<br>1571 vw                         | 1605 sh<br>1570 m                                   | 1570 sh<br>1540 sh            |
|                     |                              | 1532 s                                               | 1539 w<br>1505 vw                           | 1544 m<br>1495 sh                          | 1544 m<br>1475 vw                         | 1544 m                                     | 1544 w<br>1480 sh                          | 1537 m<br>1480 sh                                   | 1480 sh                       |
| $\delta(\text{BH})$ |                              | 1317 m                                               | 1315 sh                                     | 1315 sh                                    | 1315 sh                                   |                                            |                                            |                                                     |                               |
|                     |                              | 1260 sh<br>1232 m<br>1198 vs                         | 1245 sh<br>1199 vs<br>1185 sh               | 1261 s<br>1180 vs<br>1165 sh               | 1261 s<br>1179 vs<br>1136 w               | 1262 s<br>1179 vs<br>1136 w                | 1261 s<br>1179 vs<br>1165 sh               | 1315 s<br>1259 s<br>1164 vs                         | 1318 s<br>1164 vs             |
|                     | 1163 vs                      | 1173 s<br>1129 w                                     | 1177 sh<br>1130 w                           | 1135 m<br>1065 sh                          | 1136 w<br>1066 m                          | 1136 w<br>1065 w                           | 1165 sh<br>1065 vw                         | 1045 m<br>1011 m                                    | 1024 m                        |
|                     | 1067 s                       | 1074 w                                               | 1071 m<br>1055 sh                           | 1016m                                      | 1015 m                                    | 1015 m                                     | 1016 m                                     |                                                     |                               |
|                     |                              | 999 w                                                | 1014 m                                      |                                            |                                           |                                            |                                            |                                                     |                               |
| other               |                              | 922 vw<br>901 w<br>880 vw<br>837 w<br>797 w<br>742 w | 915 vw<br>895 w<br>865 sh<br>834 m<br>806 m | 920 vw<br>902 w<br>842 w<br>800 m<br>784 m | 921vw<br>902 w<br>842 w<br>799 m<br>783 m | 921 vw<br>902 w<br>843 w<br>800 m<br>783 m | 920 vw<br>902 w<br>843 w<br>800 m<br>783 m | 829 w<br>754 m                                      | 840 w<br>749 m                |



### 6.3. Table of IR absorption bands of NaLi(AB)<sub>2</sub>

**Table S6.3.** Absorption bands detected in IR spectra (wavenumber [cm<sup>-1</sup>]) of LiNa(AB)<sub>2</sub> at elevated temperature and after aging. Absorption bands of fresh AB, LiAB and NaAB at RT are shown for comparison. Assignment of the bands for AB is according to J. Baumann *et al.*, *Thermochim. Acta*, **430** (2005) 430. ( $\nu$  = stretching,  $\delta$  = deformation: bending and torsional modes).

| Band          | fresh at room temperature    |                                         |                                        | NaLi(AB) <sub>2</sub>                                                                        |                                                                                              |                                                                                           |                                                                                                         |                                                                                             |                               |                                        |
|---------------|------------------------------|-----------------------------------------|----------------------------------------|----------------------------------------------------------------------------------------------|----------------------------------------------------------------------------------------------|-------------------------------------------------------------------------------------------|---------------------------------------------------------------------------------------------------------|---------------------------------------------------------------------------------------------|-------------------------------|----------------------------------------|
|               | AB                           | LiAB                                    | NaAB                                   | fresh/RT                                                                                     | 150d/-35°C                                                                                   | 18d/RT                                                                                    | 96h/47°C                                                                                                | 2m/60°C                                                                                     | 88d/RT                        | 2m/110°C                               |
| $\nu$ (NH)    |                              |                                         | 3393 vw<br>3380 vw<br>3369 vw          |                                                                                              |                                                                                              | 3410 vw                                                                                   | 3410 vw                                                                                                 | 3410 vw                                                                                     |                               |                                        |
|               |                              | 3370 sh<br>3359 m                       |                                        | 3354 w                                                                                       | 3354 w                                                                                       | 3354 w                                                                                    | 3376 vw<br>3354 w                                                                                       | 3354 w                                                                                      | 3352 w                        | 3351 w                                 |
|               |                              |                                         | 3329 vw                                |                                                                                              |                                                                                              |                                                                                           |                                                                                                         |                                                                                             |                               |                                        |
|               | 3311 vs<br>3253 vs<br>3196 s | 3310 w<br>3273 vw<br>3251 vw<br>3185 sh | 3303 m<br>3256 w<br>3200 vw            | 3303 m<br>3256 w<br>3215 sh<br>3180 sh                                                       | 3303 m<br>3256 w<br>3215 sh<br>3180 sh                                                       | 3303 m<br>3256 w<br>3210 sh                                                               | 3303 m<br>3256 w<br>3210 sh                                                                             | 3303 m<br>3256 w<br>3205 sh                                                                 | 3303 vw<br>3256 vw<br>3200 sh | 3305 sh<br>3255 vw<br>3200 sh          |
| $\nu$ (BH)    |                              | 2515 sh                                 |                                        | 2355 sh                                                                                      | 2350 sh                                                                                      | 2359 s                                                                                    | 2360 sh                                                                                                 | 2355 sh                                                                                     |                               |                                        |
|               | 2347 vs<br>2289 s            | 2326 m<br>2280 sh<br>2245 s<br>2194 vs  | 2340 s<br>2289 s<br>2224 s             | 2328 s<br>2275 sh<br>2202 vs                                                                 | 2336 vs<br>2275 s<br>2211 vs                                                                 |                                                                                           | 3325 sh<br>2270 sh<br>2206 vs                                                                           | 2315 sh<br>2275 sh<br>2209 vs                                                               | 2270 sh<br>2202 s             | 2320 sh<br>2270 sh<br>2197 s           |
|               | 2118 m                       | 2152 s<br>2035 sh                       | 2120 sh<br>2065 sh                     | 2140 sh<br>2025 sh                                                                           | 2140 sh<br>2025 sh                                                                           |                                                                                           | 2165 vs                                                                                                 |                                                                                             | 2093 s                        | 2081 s                                 |
|               |                              |                                         |                                        |                                                                                              |                                                                                              |                                                                                           |                                                                                                         |                                                                                             |                               |                                        |
| $\nu$ (BN)    | 1363 s                       | 1381 w                                  | 1448 vs<br>1385 m                      | 1382 m                                                                                       | 1382 m                                                                                       | 1384 vw                                                                                   | 1470 sh<br>1400 m                                                                                       | 1461 m<br>1397 m                                                                            | 1401 vs                       | 1401 vs                                |
| $\delta$ (NH) | 1611 m                       | 1605 sh<br>1570 w<br>1544 m<br>1495 sh  | 1608 w<br>1532 s                       | 1609 vw<br>1557 w<br>1539 w<br>1505 vw                                                       | 1610 vw<br>1558 w<br>1538 w<br>1505 vw                                                       | 1606 w<br>1557 m<br>1538 m<br>1502 m                                                      | 1605 sh<br>1557 m<br>1537 m<br>1505 m                                                                   | 1605 w<br>1558 m<br>1540 m<br>1500 m                                                        | 1605 vw<br>1560 sh            | 1605 sh<br>1560 sh                     |
|               |                              | 1315 sh<br>1261 s                       | 1317 m<br>1260 sh<br>1232 m<br>1198 vs | 1315 sh<br>1245 sh<br>1199 vs<br>1185 sh<br>1177 sh<br>1130 w<br>1071 m<br>1055 sh<br>1014 m | 1275 sh<br>1245 sh<br>1199 vs<br>1189 vs<br>1175 sh<br>1131 w<br>1067 m<br>1055 sh<br>1013 m | 1326 w<br>1247 s<br>1198 vs<br>1189 vs<br>1170 sh<br>1130 w<br>1073 w<br>1055 w<br>1013 m | 1317 vw<br>1275 sh<br>1244 m<br>1198 vs<br>1190 vs<br>1170 sh<br>1131 m<br>1070 sh<br>1055 sh<br>1013 m | 1323 vw<br>1242 s<br>1198 vs<br>1187 vs<br>1173 vs<br>1130 sh<br>1070 w<br>1060 w<br>1013 m | 1325 sh<br>1250 sh<br>1200 sh | 1250 sh<br>1162 vs<br>1070 sh<br>996 m |
| other         |                              | 920 vw<br>902 w                         | 922 vw<br>901 w<br>880 vw              | 915 vw<br>895 w<br>865 sh                                                                    | 915 vw<br>895 w<br>834 m<br>806 m                                                            | 915 vw<br>896 w<br>863 vw<br>830 m<br>803 m                                               | 916 vw<br>896 w<br>865 sh<br>831 m<br>803 m                                                             | 915 vw<br>896 w<br>865 sh<br>831 m<br>803 m                                                 | 873 vw<br>824 vw              | 881 w<br>881 w                         |
|               |                              | 842 w<br>800 m<br>784 m                 | 837 w<br>797 w<br>742 w                |                                                                                              |                                                                                              |                                                                                           |                                                                                                         |                                                                                             |                               |                                        |
|               |                              |                                         |                                        |                                                                                              |                                                                                              |                                                                                           |                                                                                                         |                                                                                             |                               |                                        |
|               |                              |                                         |                                        |                                                                                              |                                                                                              |                                                                                           |                                                                                                         |                                                                                             |                               |                                        |
|               |                              |                                         |                                        |                                                                                              |                                                                                              |                                                                                           |                                                                                                         |                                                                                             | 728 m                         | 733 m                                  |

## 7. XRD study of thermal decomposition of bimetallic lithium-sodium amidoborane

To check what is the effect ammonia evolution on the crystal structure of the residue we collected XRD diffractograms of freshly prepared amidoboranes heated to *ca.* 50°C (at this temperature transformation to ionic phase is already quite advanced and NH<sub>3</sub> is partly desorbed). Decomposition around 100°C was also monitored. We observe after short heating at *c.a.* 50°C amidoboranes largely remain crystalline (scanning speed > 1°/min), while further heating to 70°C (20°C below hydrogen evolution) results in amorphisation of the samples. It can be anticipated that small fraction of the samples may become amorphous even at 50°C.

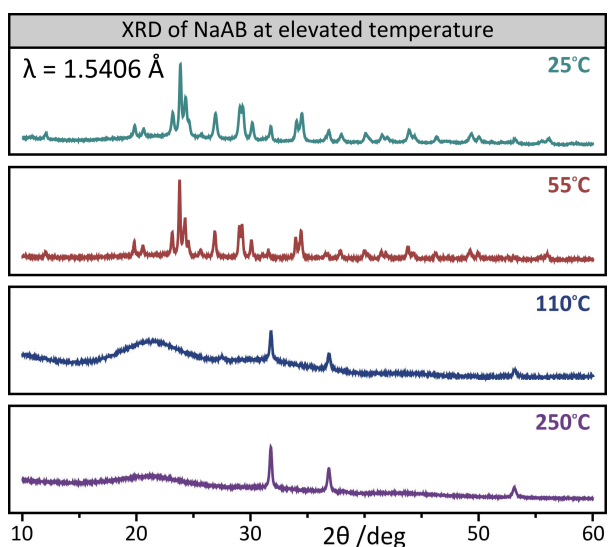

**Fig. S7.1.** Comparison of diffractograms collected during thermal decomposition of NaAB sample.

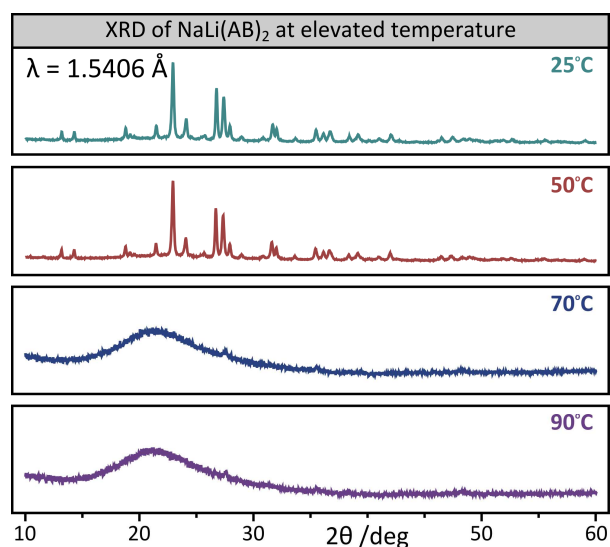

**Fig. S7.2.** Comparison of diffractograms collected during thermal decomposition of NaLi(AB)<sub>2</sub> sample.

## 8. Solid state $^1\text{H}$ NMR and $^{11}\text{B}$ NMR study of alkali metal amidoboranes

**Table S8.** Solid state MAS NMR spectra were collected for fresh NaAB, LiAB and NaLi(AB)<sub>2</sub> and the samples heated to 50°C and cooled down to room temperature, to monitor changes associated with the transition to ionic form. At 50°C transformation to ionic phase is already quite advanced and NH<sub>3</sub> is partly desorbed. Small but systematic downshift of the chemical shift in the  $^{11}\text{B}$  spectra is observed (by *ca.* 1–2 ppm) as well as considerable downshift of the signals seen in the  $^1\text{H}$  spectra.

|                     | NaAB                                |                        | LiAB                    |                         | NaLi(AB) <sub>2</sub>               |                         |
|---------------------|-------------------------------------|------------------------|-------------------------|-------------------------|-------------------------------------|-------------------------|
|                     | fresh                               | 50°C                   | fresh                   | 50°C                    | fresh                               | 50°C                    |
| $^{11}\text{B}$ NMR | -20.5 ppm<br>+21.0 ppm              | -21.5 ppm<br>+20.0 ppm | -20.6 ppm<br>+29.5 ppm  | -22.4 ppm<br>+27.0 ppm  | -20.7 ppm<br>+24.0 ppm              | -20.6 ppm<br>+26.2 ppm  |
| $^1\text{H}$ NMR    | -0.2 ppm<br>+2.6 ppm<br>+5 ppm (sh) | –<br>–<br>–            | -0.2 ppm<br>+3 ppm (sh) | -2.1 ppm<br>+3 ppm (sh) | -0.5 ppm<br>+0.2 ppm<br>+5 ppm (sh) | -2.2 ppm<br>+4 ppm (sh) |

### 9. Attempts of pre-desorption of NH<sub>3</sub>: isothermal heating of NaAB at 48°C and 60°C.

We tried to completely desorb NH<sub>3</sub> from a freshly synthesized NaAB to prepare a novel material which would evolve pure H<sub>2</sub>. Samples of NaAB were preheated in a thermostat at 47°C for 2h and 48h. The sample preheated for 2h starts to evolve NH<sub>3</sub> already at 35°C indicating presence of the “ionic phase”, but apart from that its TGA profile looks very similar to the profile of freshly prepared NaAB (Fig.S9.1). The sample preheated for 48h is different from that preheated for 2h, but it still evolves some NH<sub>3</sub> (Fig.S9.2). Therefore, we tried to desorb NH<sub>3</sub> during isothermal TGA measurement at 60°C for 2 hours, followed by full heating scan. However, small quantities of NH<sub>3</sub> were still desorbed together with H<sub>2</sub> at *c.a.* 80°C.

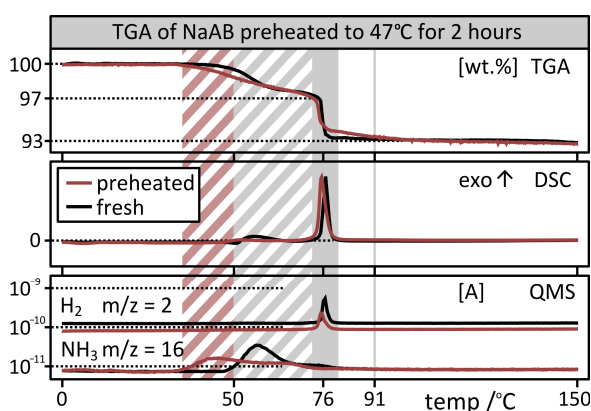

**Fig. S9.1.** Comparison of TGA/DSC profiles of freshly prepared and preheated NaAB with scanning rate 1K/min. NaAB was preheated at 47°C for 2 hours. Shift of NH<sub>3</sub> evolution onset is marked with red striped field.

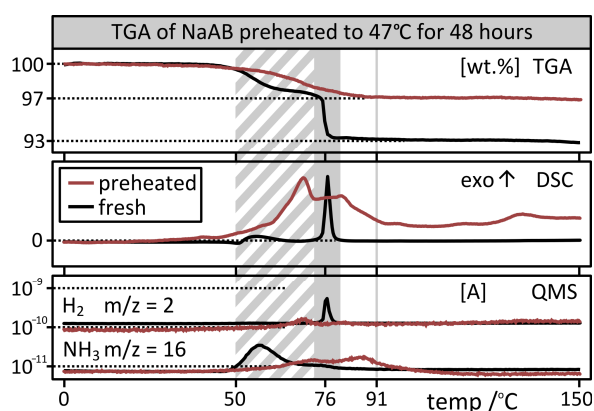

**Fig. S9.2.** Comparison of TGA/DSC profiles of freshly prepared and preheated NaAB with scanning rate 1K/min. NaAB was preheated at 47°C for 48h.

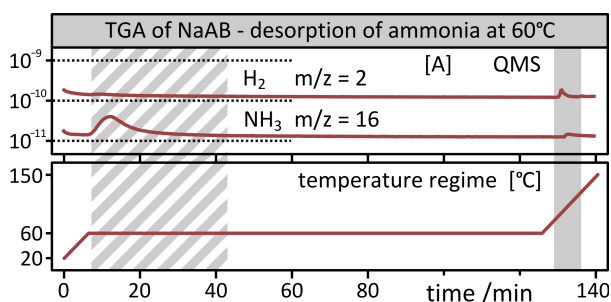

**Fig. S9.3.** Results of a TGA experiment with an attempt of desorbing NH<sub>3</sub> from NaAB during an isothermal scan at 60°C for 2 hours followed by heating with scanning rate of 1K/min.

## 10. Heat capacity measurements and low temperature XRD study of NaAB.

We observe a characteristic lambda transition at *ca.*  $-50^{\circ}\text{C}$  when measuring heat capacity of NaAB in the range from room temperature down to 10K. The observed transition is reversible with no hysteresis. The temperature at which the transition takes place is similar to the temperature of crystallographic phase transition of AB precursor (225 K or  $-48^{\circ}\text{C}$  according to: N. J. Hess et al., J. Phys. Chem. A 113 (2009) 5723-5735). To elucidate the origin of the observed lambda transition we have collected low temperature XRD patterns ( $-60^{\circ}\text{C}$ ,  $-160^{\circ}\text{C}$ ,  $-170^{\circ}\text{C}$ ) of NaAB. However, we do not observe any high- or low-T AB forms in the XRD (the only new reflections that appear after cooling represent ice which cover a quartz capillary during low temperature measurements). In addition, the integrated heat of the lambda peak strongly varies from sample to sample (22–211 J mol<sup>-1</sup> NaAB), while the heat associated with the crystallographic phase transition of AB equals 1290 J mol<sup>-1</sup> (O. Palumbo et al., J. Alloys Comp. 5095 (2011) 5709-5713). This means that if AB was responsible for the observed lambda peak, its content in the sample would be around 1.5–15 mol %; the latter number seems to be impossible at first, since as much as 15 mol % AB would immediately be seen in XRD pattern. One possible explanation of this discrepancy is that some AB might be generated during loading of the sample for specific heat measurement; exposure of NaAB to atmosphere results in partial hydrolysis yielding AB (K. Fijalkowski et al., J. Mater. Chem. 19 (2009) 2043-2050). AB is not seen in XRD patterns since the sample studied with thermal resolution has not been subjected to atmosphere at all (quartz capillary was sealed).

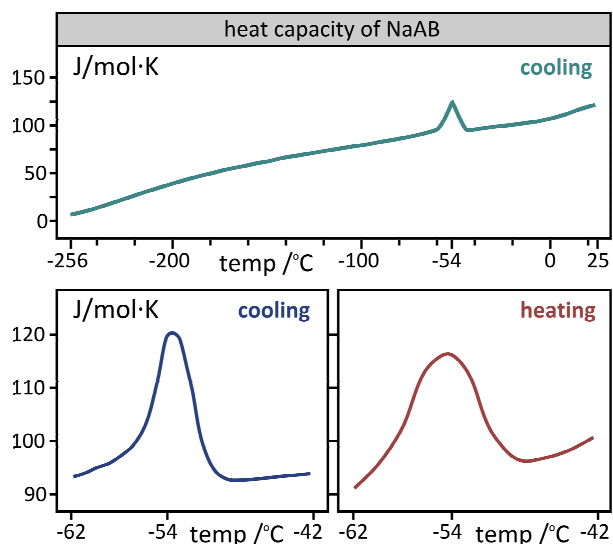

**Fig. S10.1.** Results of heat capacity measurement of NaAB sample with visible lambda transition peak at  $-54^{\circ}\text{C}$ .

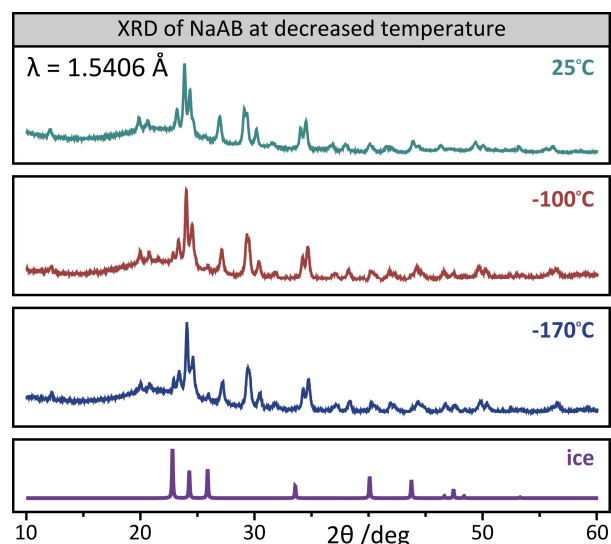

**Fig. S10.2.** Comparison of diffractograms collected while cooling NaAB sample. In the bottom frame pattern of hexagonal ice is shown.
